# Supplementary material for: Mapping Alpine Grassland Fraction Coverage Using Zhuhai-1 OHS Imagery in the Three River Headwaters Region, China
Source: MDPI journal article supplement (doi:10.3390/rs15092289), 2023-04-26
Supplement: s1 [file s1]

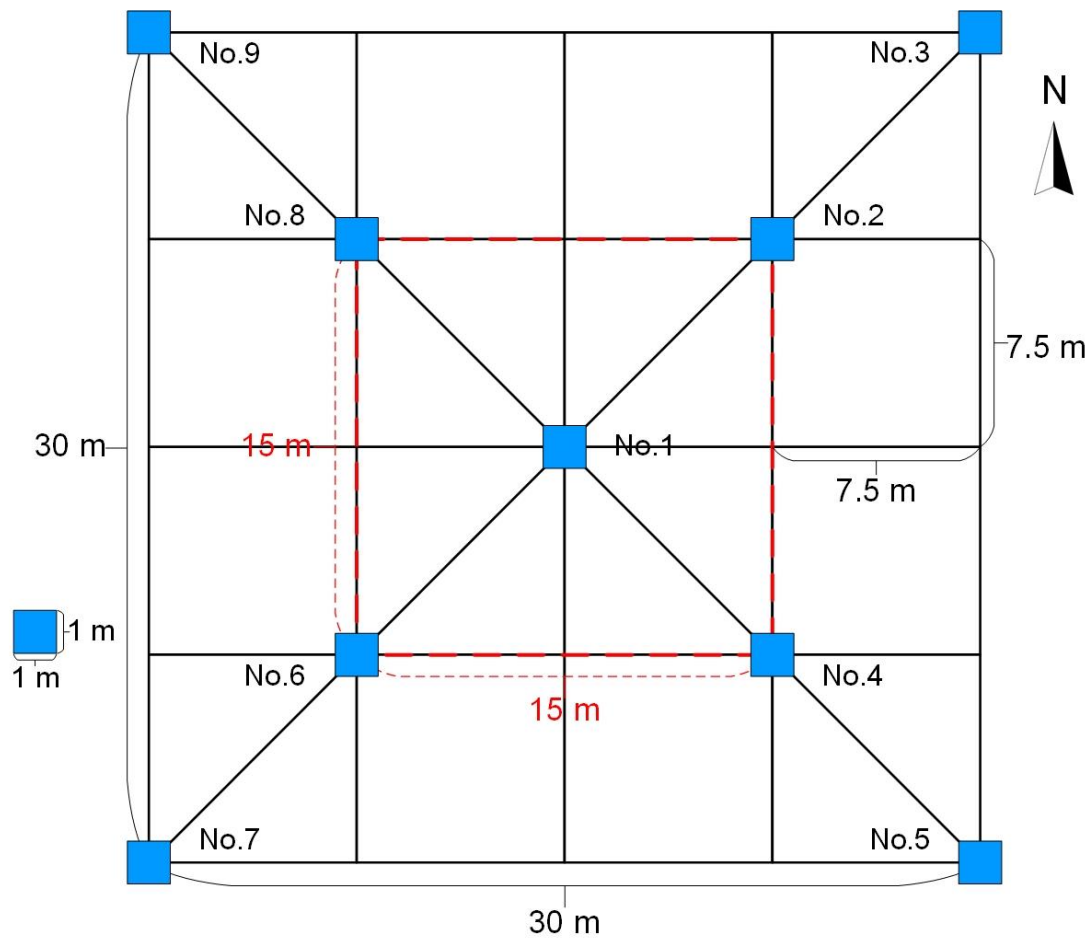

**Figure S1.** Sample plot structure. 30 m by 30 m sample plot, the blue quadrats are nine 1 m by 1 m independent subplots set in four directions extending from the center of the sample plots.

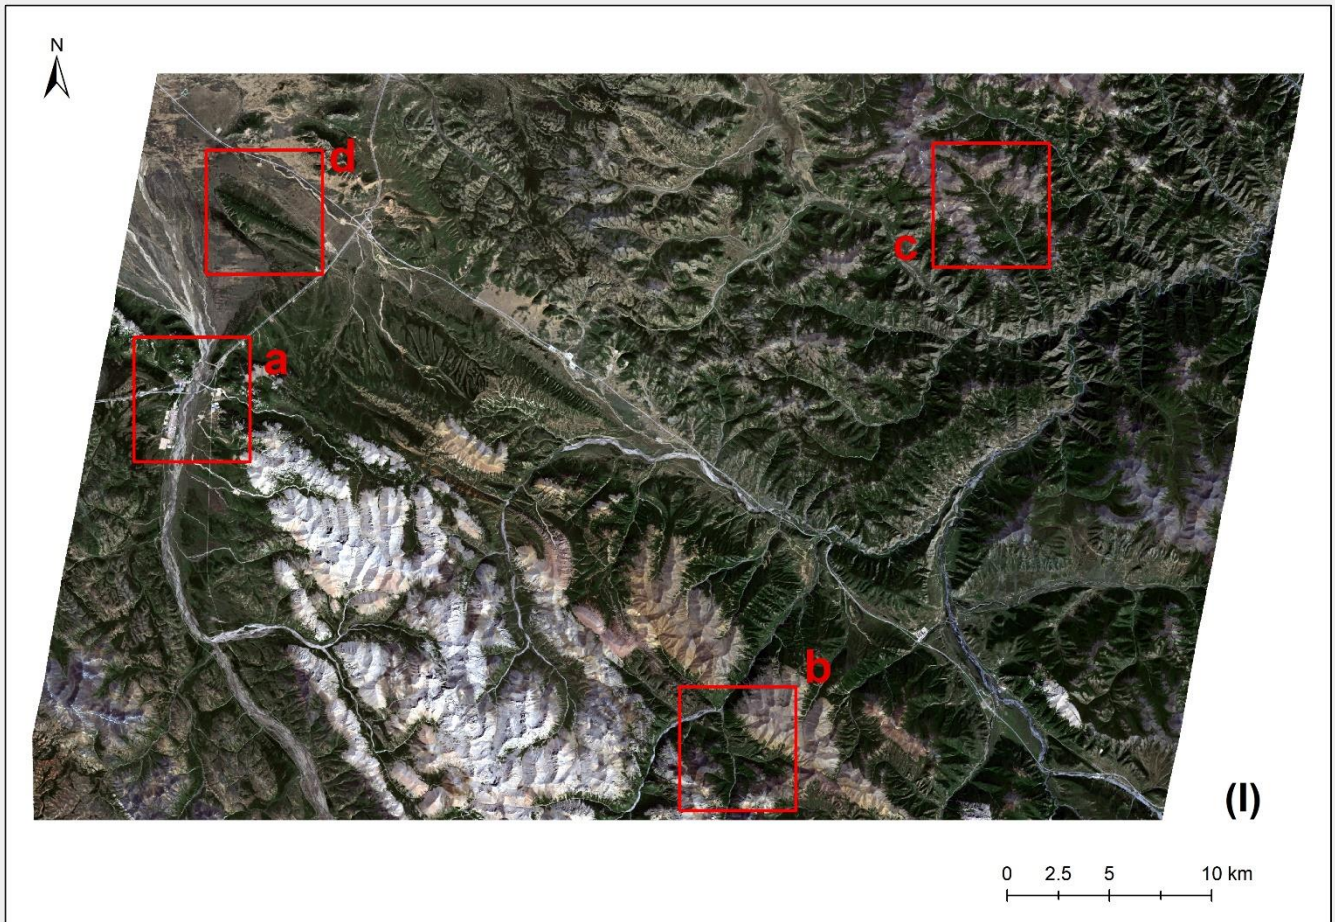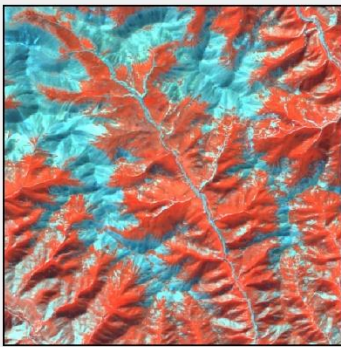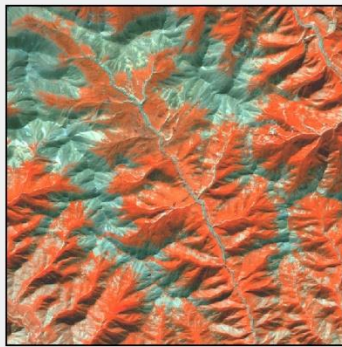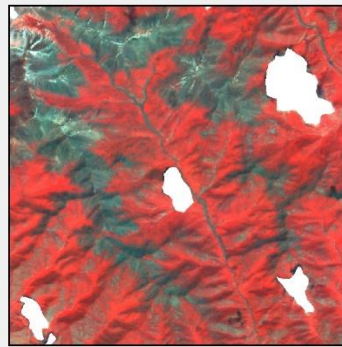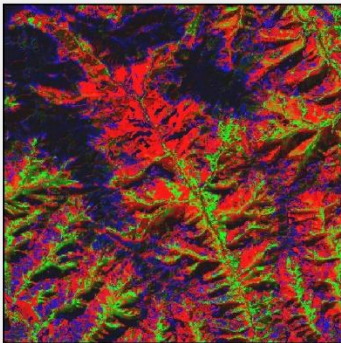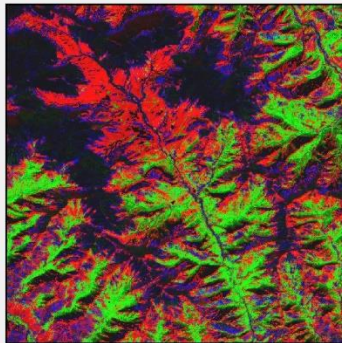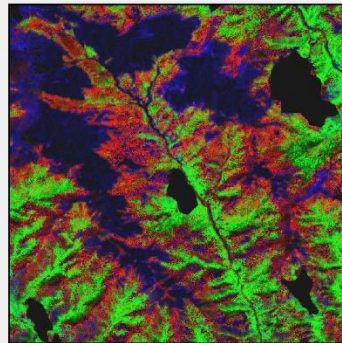

(c1)  
Landsat 8 OLI

(c2)  
Sentinel-2

(c3)  
Zhuhai-1 OHS



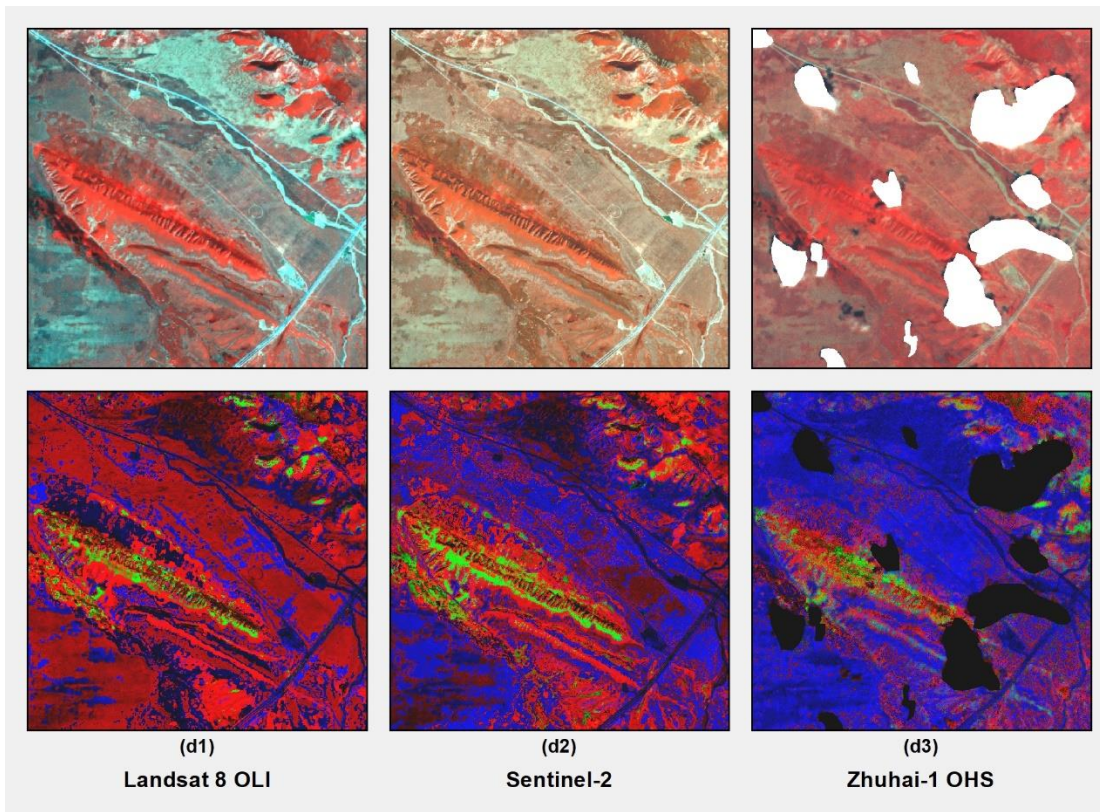

**Figure S2.** Comparison of unmixing results derived from Landsat 8 OLI, Sentinel-2, and Zhuhai-1 OHS images. (a) Full study area scene illustrating comparison locations a, b, c and d. Panel “c” is detail of area “c”, and panel “d” is detail of area “d” where the top row is original imagery, and bottom row is unmixed imagery from indicated sources at the landscape scale. Red is the HCG fraction, green is the MCG fraction, and blue is the LCG fraction. The black area in the Zhuhai-1 OHS image was could masked. For detailed information for c and d see Figure S2.

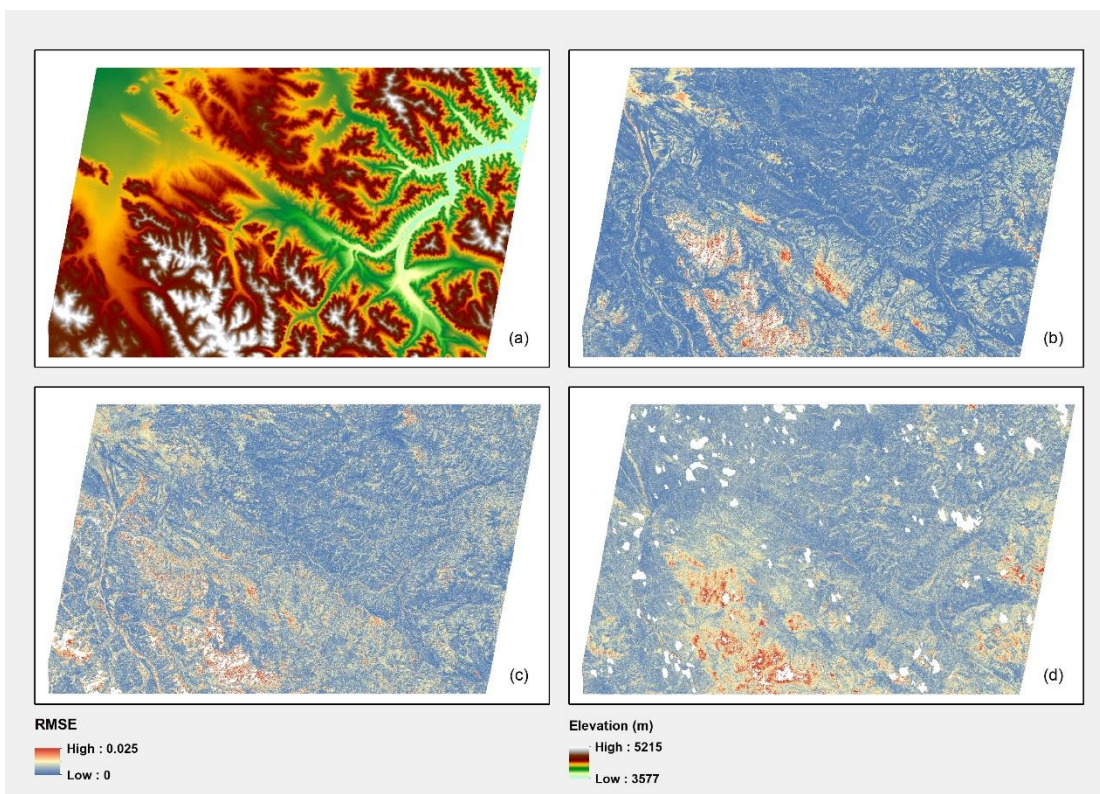

**Figure S3.** RMSE distribution of the three image sources. Digital Elevation Model (DEM) of the study region (a). RMSE from Landsat 8 OLI imagery (b). RMSE from Sentinel-2 imagery (c), and RMSE from Zhuhai-1 OHS imagery (d).



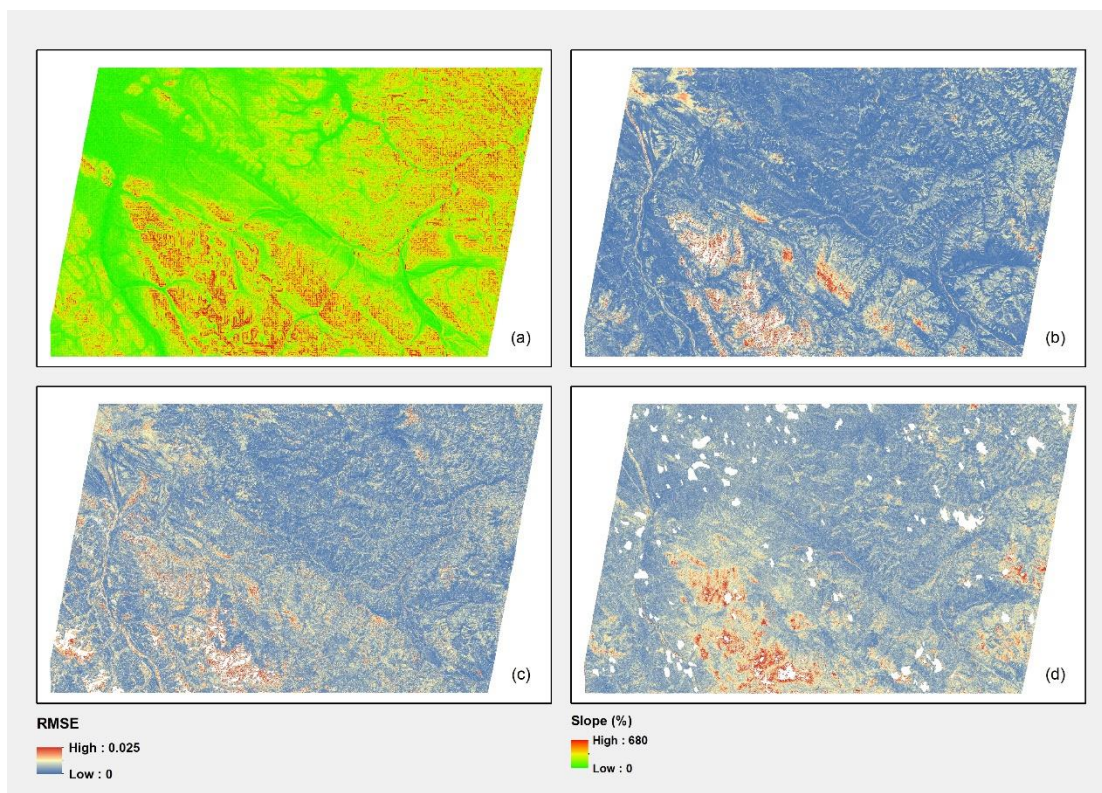

**Figure S4.** RMSE distribution of the three image sources. Slope of the study region derived from the DEM (a). RMSE from Landsat 8 OLI imagery (b). RMSE from Sentinel-2 imagery (c), and RMSE from Zhuhai-1 OHS imagery (d).

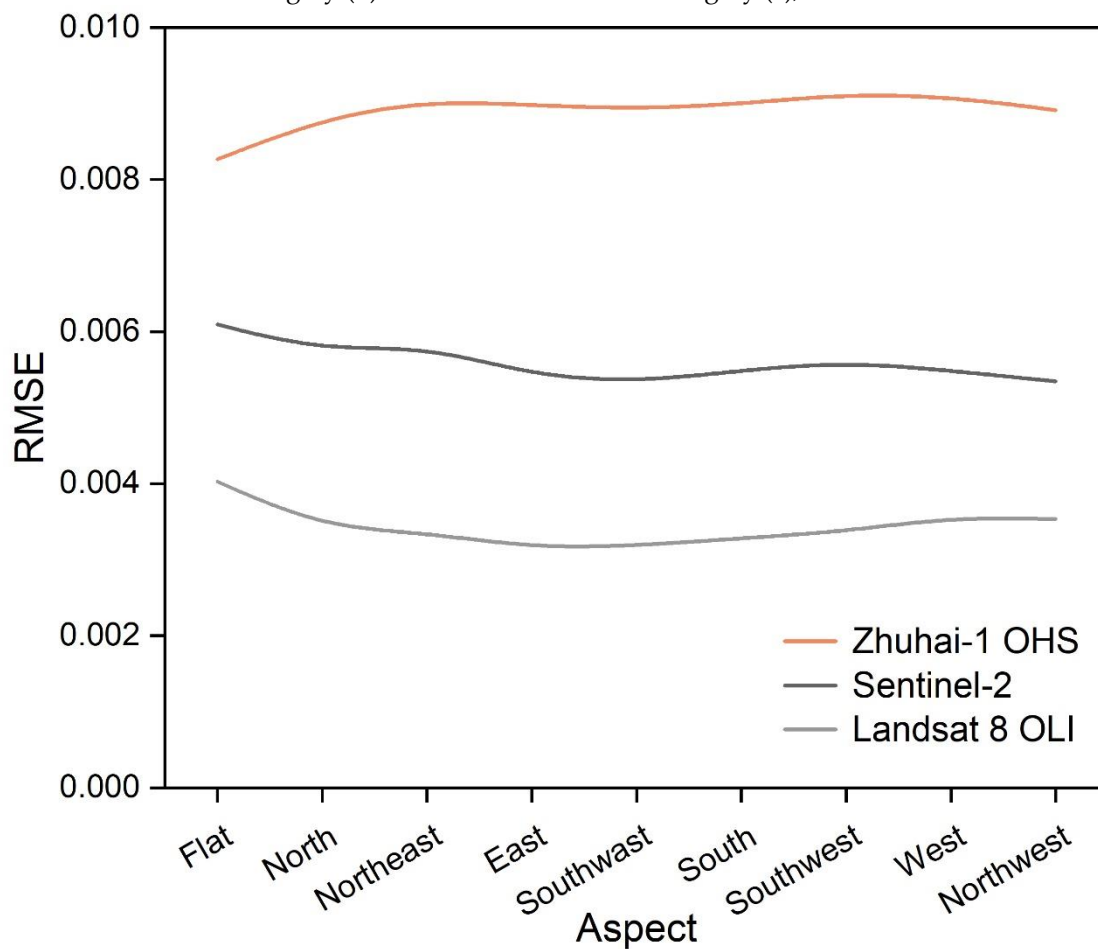

**Figure S5.** Distribution of RMSE observed from various aspect for Zhuhai-1 OHS, Sentinel-2, and Landsat 8 OLI imagery, respectively.
